# Supplementary material
Source: HighWire-hosted journal article supplement (https://bibliotheek.ehb.be/content/15/5/428)

SUPPLEMENTARY MATERIAL

Supplementary Table 1. Bias assessment

| Authors             | Y. of publ. | Patient selection |                              | Index text   |                              | Reference standard |                              | Time and flow |
|---------------------|-------------|-------------------|------------------------------|--------------|------------------------------|--------------------|------------------------------|---------------|
|                     |             | Risk of bias      | Concerns about applicability | Risk of bias | Concerns about applicability | Risk of bias       | Concerns about applicability | Risk of bias  |
| Imai et al.         | 2005        | Low               | Low                          | High         | High                         | High               | High                         | Low           |
| Jovin et al.        | 2005        | Low               | Low                          | High         | High                         | High               | High                         | Low           |
| Dabitz et al.       | 2007        | Low               | Low                          | High         | High                         | High               | High                         | Low           |
| Papanagiotou et al. | 2011        | Low               | Low                          | Low          | Low                          | Low                | Low                          | Low           |
| Hajdukova et al.    | 2013        | Low               | High                         | High         | High                         | High               | High                         | Low           |
| Dalyiai et al.      | 2013        | Low               | Unclear                      | High         | High                         | High               | High                         | Low           |
| Mpotsaris et al.    | 2013        | Low               | Low                          | Low          | Low                          | Low                | Low                          | Low           |
| Stampfl et al.      | 2014        | Low               | Low                          | Low          | Low                          | Unclear            | Low                          | Low           |
| Tütüncü et al.      | 2014        | Low               | Low                          | Low          | Low                          | Low                | Low                          | Low           |
| Lescher et al.      | 2014        | Low               | Low                          | Low          | Low                          | Low                | Low                          | Low           |
| Heck et al.         | 2014        | Low               | Low                          | Low          | Low                          | Low                | Low                          | Low           |
| Cohen et al.        | 2014        | Low               | Low                          | Low          | Low                          | Low                | Low                          | Low           |
| Lockau et al.       | 2014        | Low               | Low                          | Low          | Low                          | Low                | Low                          | Low           |
| Spiotta et al.      | 2014        | Low               | Low                          | High         | Unclear                      | Low                | Low                          | Low           |
| Dababneh et al.     | 2014        | Low               | Low                          | High         | Unclear                      | Low                | Low                          | Low           |
| Choi et al.         | 2014        | Low               | Low                          | Low          | Low                          | Low                | Low                          | Low           |
| Behme et al.        | 2015        | Low               | Low                          | Low          | Low                          | Low                | Low                          | Low           |
| Maurer et al.       | 2015        | Low               | Low                          | Low          | Low                          | Low                | Low                          | Low           |
| Puri et al.         | 2015        | Low               | Low                          | Low          | Low                          | Low                | Low                          | Low           |

|                         |      |     |     |      |         |     |     |     |
|-------------------------|------|-----|-----|------|---------|-----|-----|-----|
| Steglich-Arnholm et al. | 2015 | Low | Low | Low  | Low     | Low | Low | Low |
| Yoon et al.             | 2015 | Low | Low | Low  | Low     | Low | Low | Low |
| de Lucena et al.        | 2015 | Low | Low | Low  | Low     | Low | Low | Low |
| Son et al.              | 2015 | Low | Low | Low  | Low     | Low | Low | Low |
| Grigoryan               | 2016 | Low | Low | High | Unclear | Low | Low | Low |
| Fahed                   | 2016 | Low | Low | High | Unclear | Low | Low | Low |
| Rangel-Castilla et al.  | 2017 | Low | Low | Low  | Low     | Low | Low | Low |
| Sallustio et al.        | 2017 | Low | Low | Low  | Low     | Low | Low | Low |
| Akpınar et al.          | 2017 | Low | Low | Low  | Low     | Low | Low | Low |
| Mpotsaris et al.        | 2017 | Low | Low | Low  | Low     | Low | Low | Low |
| Al-Mufti et al.         | 2017 | Low | Low | Low  | Low     | Low | Low | Low |
| Mehta et al.            | 2018 | Low | Low | High | Unclear | Low | Low | Low |
| Li et al.               | 2018 | Low | Low | Low  | Low     | Low | Low | Low |
| Bartolini et al.        | 2018 | Low | Low | Low  | Low     | Low | Low | Low |
| Sadeh-Gonik et al.      | 2018 | Low | Low | High | Unclear | Low | Low | Low |
| Papanagiotou et al.     | 2018 | Low | Low | Low  | Low     | Low | Low | Low |
| Maus et al.             | 2018 | Low | Low | Low  | Low     | Low | Low | Low |
| Eker et al.             | 2018 | Low | Low | Low  | Low     | Low | Low | Low |
| Wallocka et al.         | 2019 | Low | Low | Low  | Low     | Low | Low | Low |
| Kang et al.             | 2019 | Low | Low | Low  | Low     | Low | Low | Low |
| Jadhav et al.           | 2019 | Low | Low | Low  | Low     | Low | Low | Low |
| Kim et al.              | 2020 | Low | Low | Low  | Low     | Low | Low | Low |
| Garg et al.             | 2021 | Low | Low | High | Unclear | Low | Low | Low |

|                |      |     |     |      |         |     |     |     |
|----------------|------|-----|-----|------|---------|-----|-----|-----|
| Bracco et al.  | 2021 | Low | Low | High | Unclear | Low | Low | Low |
| Li et al.      | 2021 | Low | Low | Low  | Low     | Low | Low | Low |
| Cirillo et al. | 2021 | Low | Low | Low  | Low     | Low | Low | Low |
| Pop et al.     | 2022 | Low | Low | Low  | Low     | Low | Low | Low |

**Supplementary Figure 1.** Funnel-plot for publication bias in studies included in meta-analysis for primary outcome.

No publication bias emerges from linear regression test for funnel plot asymmetry (p=0.53).

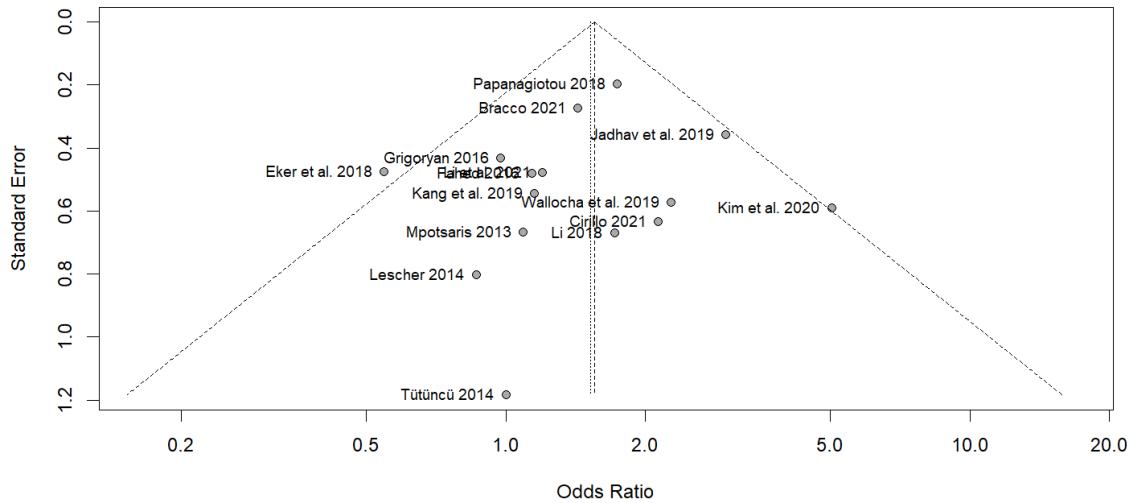

Supplementary Figure 2. Meta-analysis of proportions for mRS 0-2 in eCAS studies.

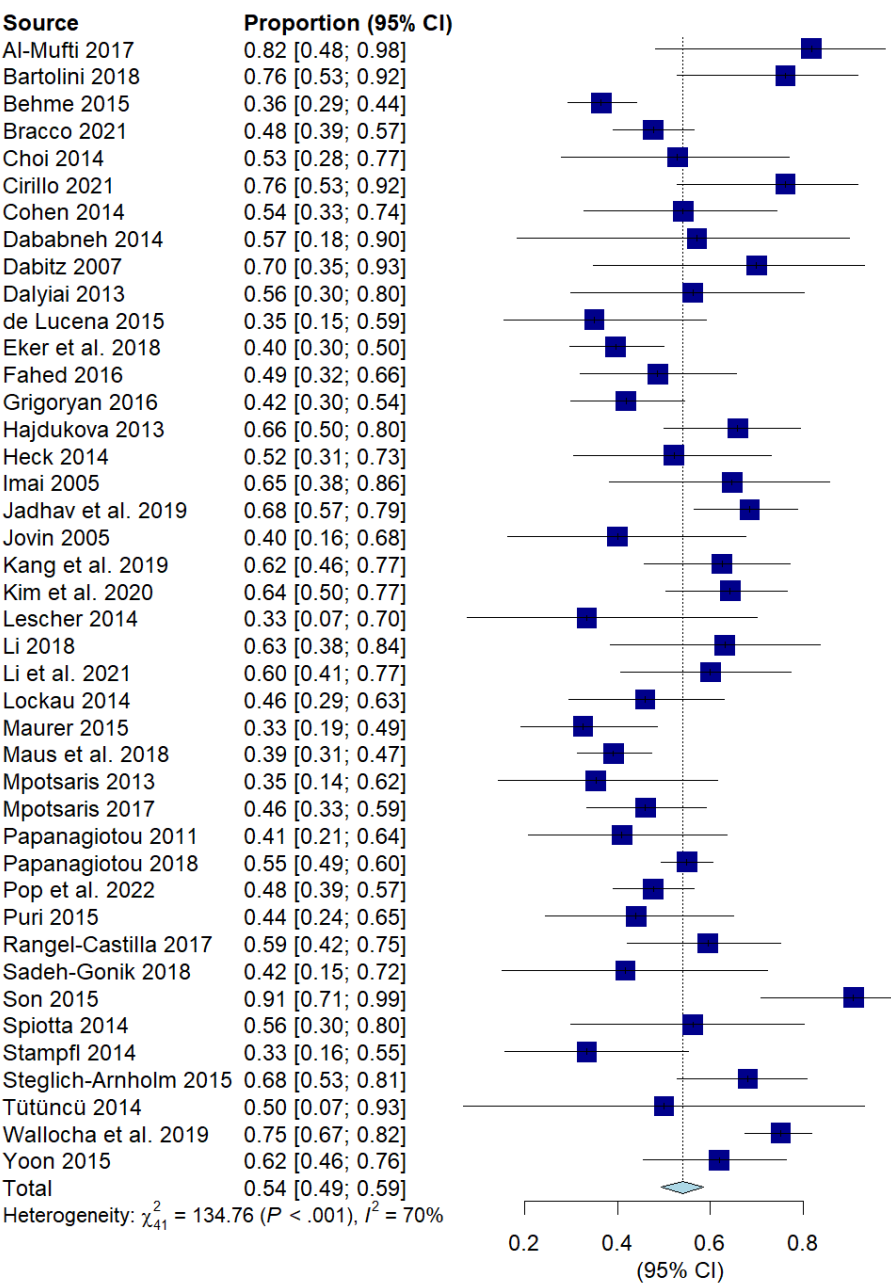

Supplementary Figure 3. Meta-analysis of proportions for mRS 0-2 in no stenting studies.

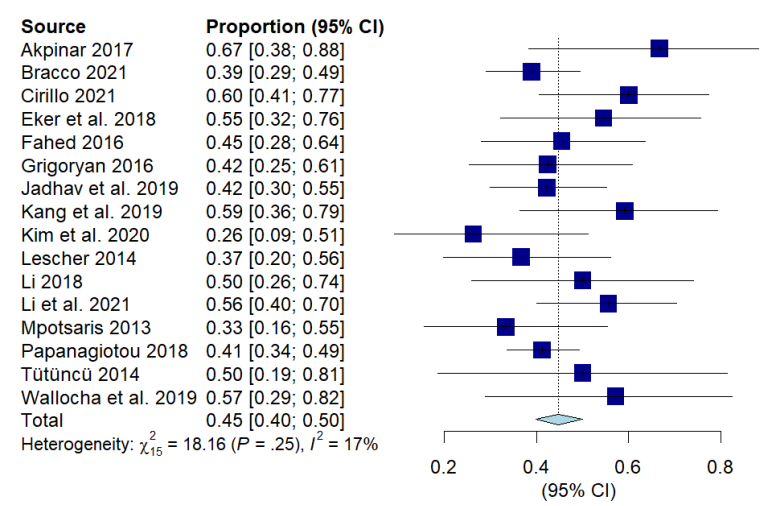

**Supplementary Figure 4.** Evolution over time of the comparison for mRS 0-2 depending on treatment paradigm.

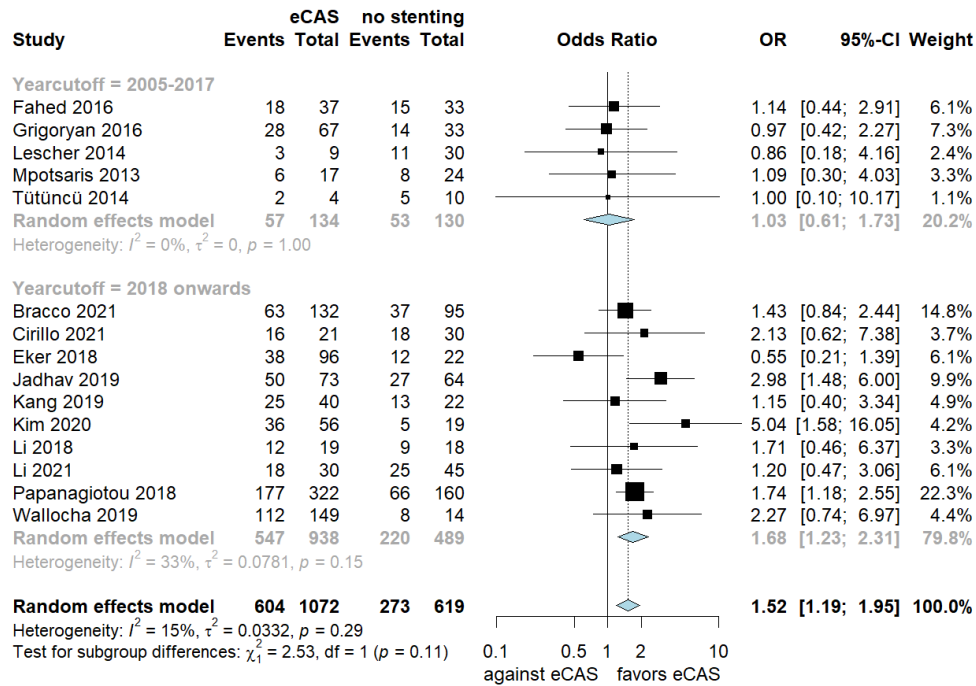

**Supplementary Figure 5.** Meta-analysis of proportions for recurrent stroke in eCAS group (above) and no stenting group (below).

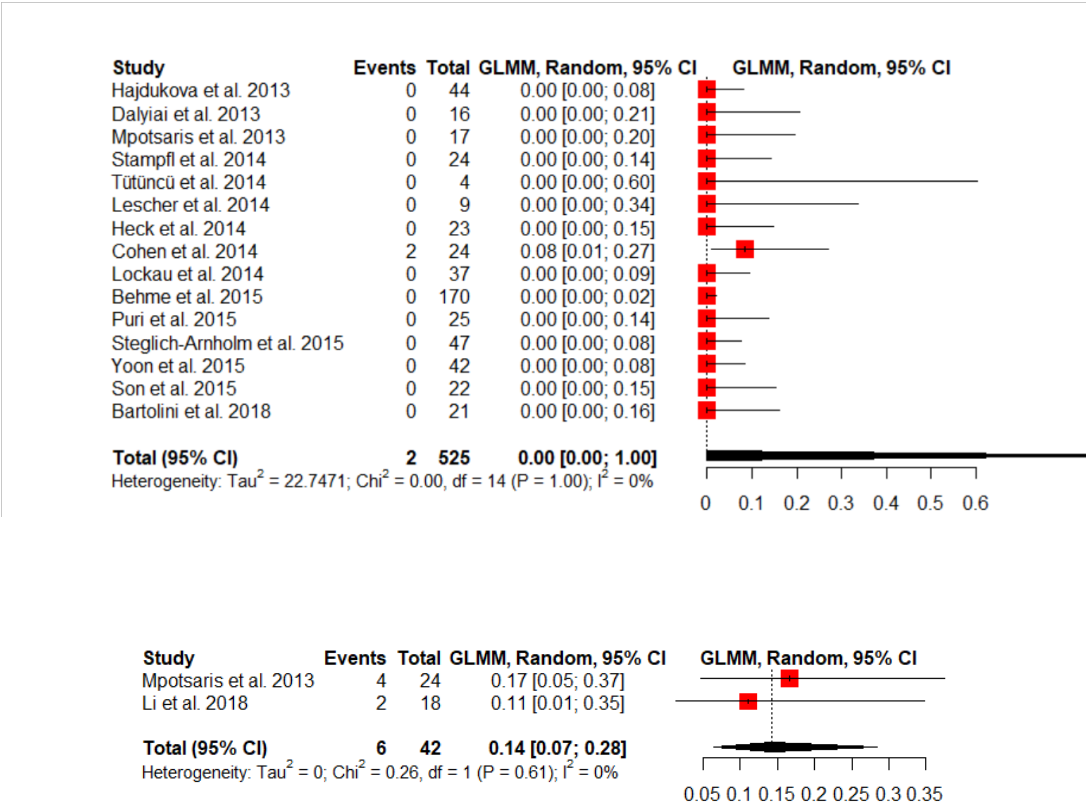

Supplementary Figure 6. Embolization to new territories depending on treatment paradigm.

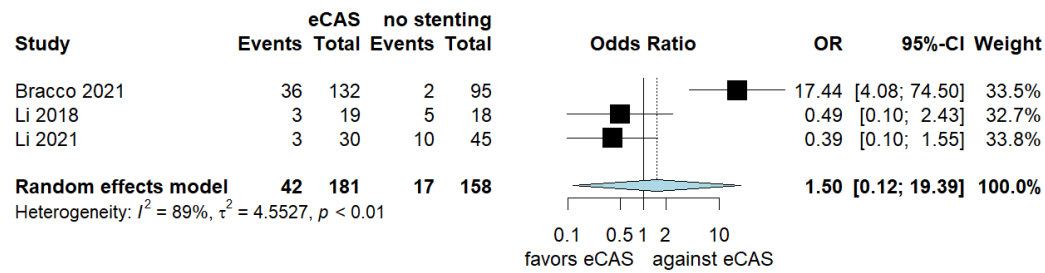



Supplementary Figure 7. Meta-analysis of proportions for restenosis after eCAS and no stenting

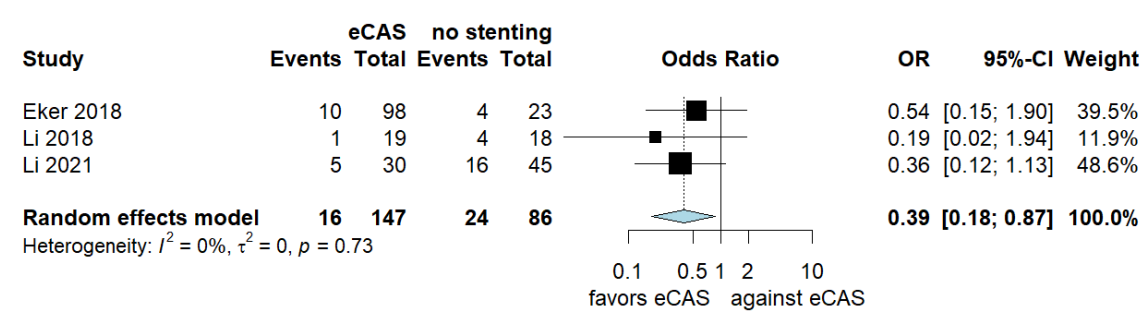

**Supplementary Figure 8.** Successful reperfusion (TICI 2b-3) prevalence depending on antegrade (stenting first) vs retrograde (mechanical thrombectomy, MT, first) in eCAS group.

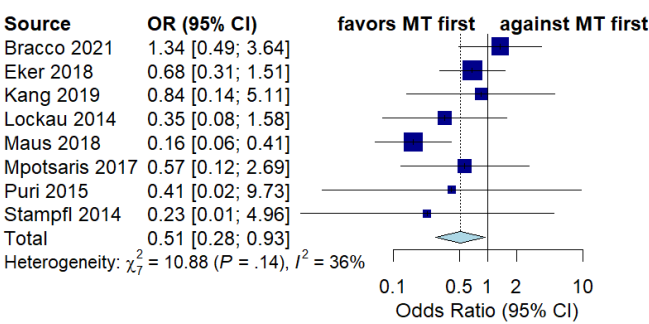

**Supplementary Figure 9.** mRS 0-2 prevalence depending on antegrade (stenting first) vs retrograde (mechanical thrombectomy, MT, first) in eCAS group.

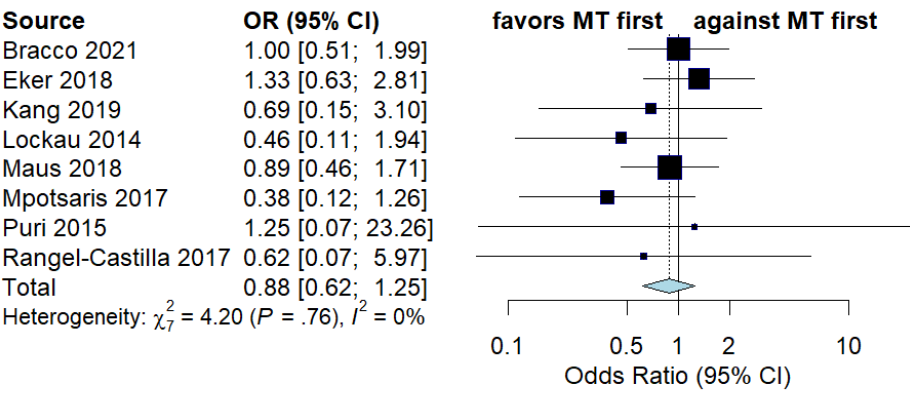

Supplementary Figure 10. sICH prevalence depending on use of antithrombotics in eCAS group.

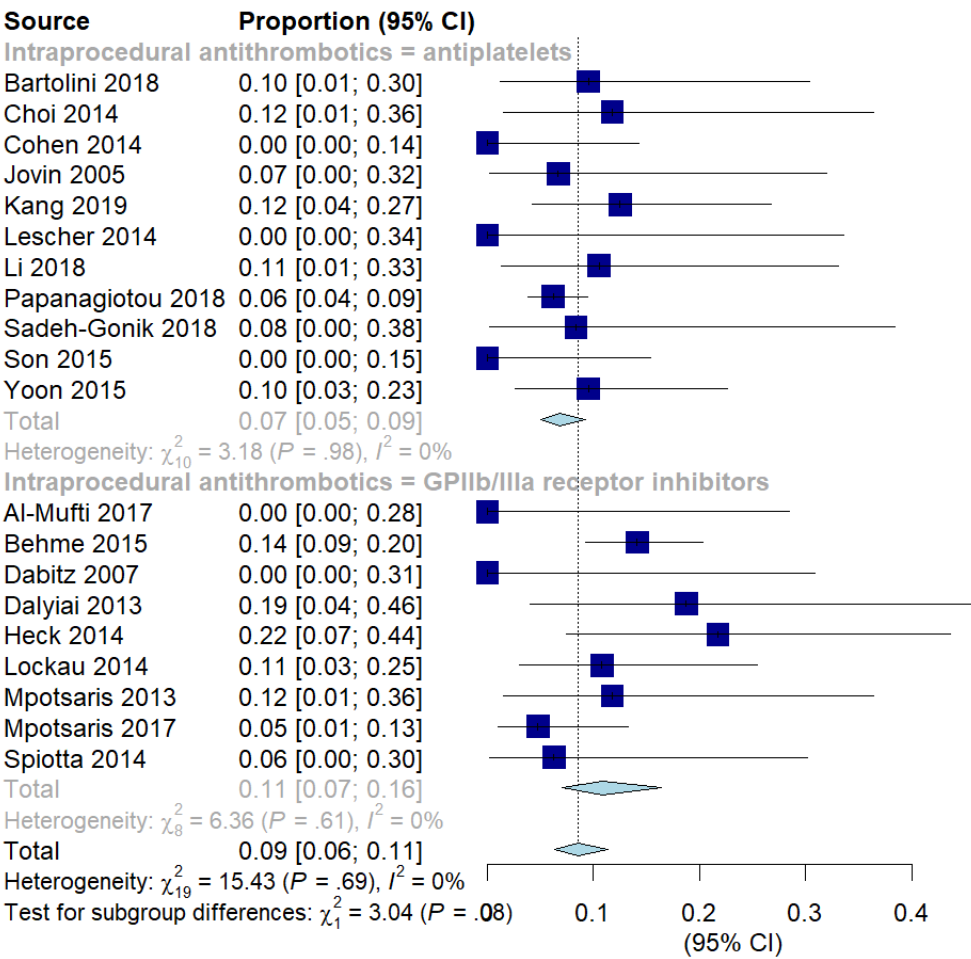

Supplementary Figure 11. mRS 0-2 prevalence depending on use of antithrombotics in eCAS group.

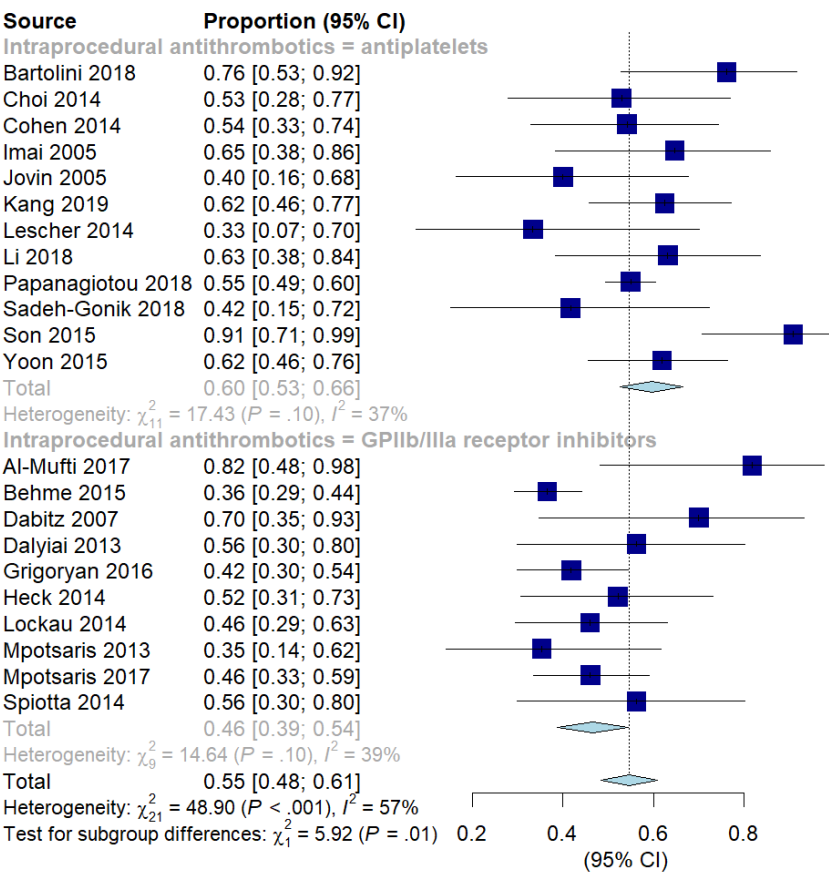

Supplement: inline-supplementary-material-1 [file inline-supplementary-material-1.pdf]
